# Supplementary material
Source: PubMed Central journal article supplement (PMC4290917)
Supplement: JCM.01946-14_zjm999093948so1.pdf [file JCM.01946-14_zjm999093948so1.pdf]

## Decontamination and Inoculation

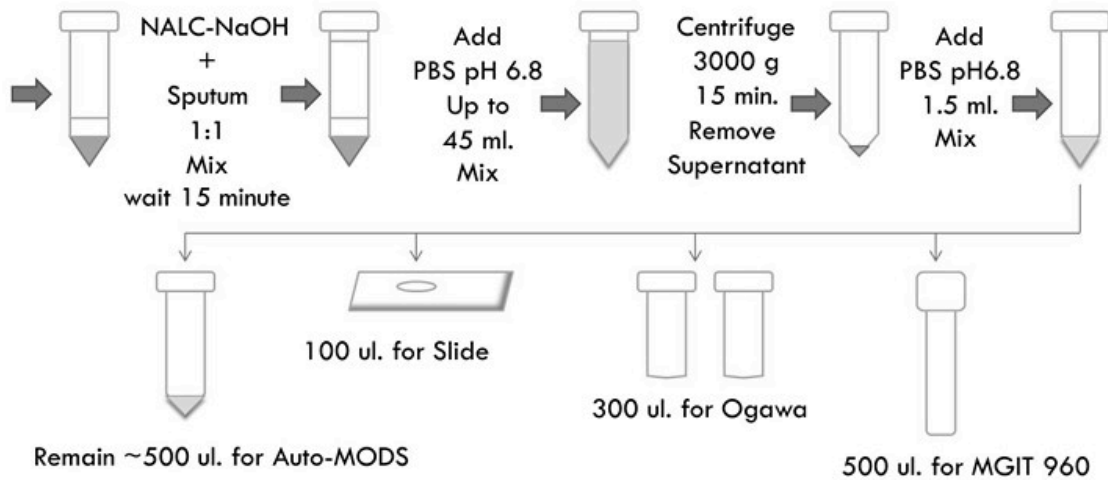

## 2<sup>nd</sup> Centrifuge and Inoculation

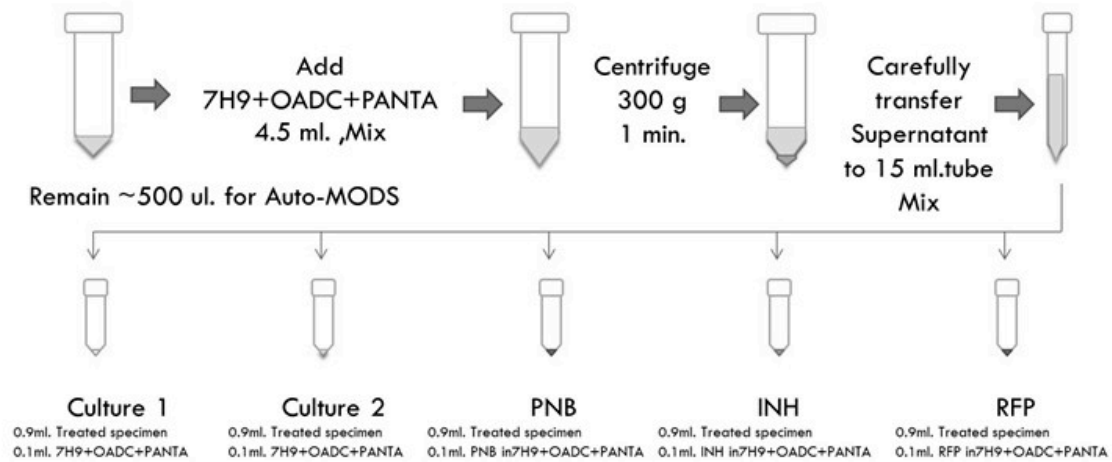

**Supplementary Figure 1.** Laboratory specimen processing procedure
