# Supplementary material
Source: PubMed Central journal article supplement (PMC4290917)
Supplement: JCM.01946-14_zjm999093948so2.pdf [file JCM.01946-14_zjm999093948so2.pdf]

**Supplementary Table 1. Culture results of Auto-MODS in reference to MGIT 960 by culture delay**

|       |     | <b>MGIT 960</b>  |     |          |    |          |    |
|-------|-----|------------------|-----|----------|----|----------|----|
|       |     | Overall          |     | 0-3 days |    | 4-7 days |    |
|       |     | +                | -   | +        | -  | +        | -  |
|       |     | <b>Auto-MODS</b> | +   | 212      | 4  | 93       | 3  |
| -     | 9   |                  | 135 | 2        | 61 | 7        | 74 |
| Total | 221 |                  | 139 | 95       | 64 | 126      | 75 |
