# Supplementary material
Source: PubMed Central journal article supplement (PMC4290917)
Supplement: JCM.01946-14_zjm999093948so3.pdf [file JCM.01946-14_zjm999093948so3.pdf]

**Supplementary Table 2. Performance measurements of Auto-MODS in reference to MGIT by culture delay**

| Performance Measure | Overall % (95% CI) | 0-3 days          | 4-7 days          |
|---------------------|--------------------|-------------------|-------------------|
| Sensitivity         | 95.9 (92.4-98.1)   | 97.9 (92.6, 99.7) | 94.4 (88.9, 97.7) |
| Specificity         | 97.1 (92.8-99.2)   | 95.3 (86.9, 99.0) | 98.7 (92.8, 100)  |
| LR+                 | 33.3 (12.7-87.6)   | 20.9 (6.92, 63.1) | 70.8 (10.1, 500)  |
| LR-                 | 0.04 (0.02-0.08)   | 0.02 (0.01, 0.09) | 0.06 (0.03, 0.12) |

Note: LR+, positive likelihood ratio; LR-, negative likelihood ratio.
